# Supplementary material
Source: MDPI journal article supplement (https://www.mdpi.com/2254-9625/11/4/115)
Supplement: s1 [file s1]

**Table S1:** Story 34, 1st grade with direct reference to COVID-19 theme

Story ID: 34;  
 Grade: 1st grade.  
 Session: 5.  
 Number of participants: 9;  
 Total participants with difficulties: 0;  
 Storytelling methodology: chained story.  
 Session theme: Family.  
 Date: 28/04/2020.  
 COVID-19 theme references: 2 (direct). Propositions: //...//. Episodes: [...].  
 Cohesion index: 5 (Thematic sequences).  
 Structure index: 4.

COHESION INDEX: 5 (Thematic sequences). Children insert an abstract element from this level (5) that interconnects at least two story episodes. This abstract element can include a theme, a conflict between characters, or a problem. Level 5 is essentially a level 4 in which the child inserts a theme, a point of view (rather abstract) that organizes the story. At this level, children get a sign of conflict, danger, and threat in the story without a clear protagonist and antagonist. The opposing forces of history are not well developed (for example, "a monster comes"). Maybe it is necessary to read "between the lines of the story" to identify a conflict, a threat, a problem.

STORY (the number of story words can vary due to Spanish-English translation): [Once upon a time, there was a little she-bear] [and the little he-bear went to play in the yard.] [Later, the she-bear went to the doctor// because she had fallen off the slide// and broke her leg//], [and the she-bear girl got better.] [Then they come back home// and played], [then they went outside again// and jumped down the slide]. [Then the father was going to scare the little he-bear // and he scared him,// and when the little he-bear got scared// he fell// and hurt his knee,] [and the little he-bear went to the doctor// and found the policeman,// he found the policeman in the doctor// because the policeman had broken his arm.] [Then the doctor dropped a medicine on his foot// and hurt his foot]. [Then, since the mother was prankish// she scared the father //and then the father broke his arm too]. [Then the rabbit came,// then it happened to him that he had broken his leg] [and thank goodness that the mother had studied medicine// and she began to cure her daughter and her son]. [Then the duck came// and ran into the mother's leg// and the duck also broke an arm.] [Later, the bunny didn't know what happened// and went to the doctor// to see what happened to the others.] [So, the cow was going to her house// and get sick of coronavirus.] [The father was cured] [and then luckily, he was also studying a little veterinarian// and he cured the duck and the cow]. [And the rabbit, when he had already been cured by the father// broke his tail.] [Dad fell out of the chair// and broke his back.] [Then the doctor came// and cured everyone], [then the doctor who had cured everyone hurt himself// because he fell]. [And then while dad healed// while he was on the computer// he broke down and hit his eye.] [Then, as the children were cured,// the mother gave them some gifts// because they had been delicious.] [Then the duck had come// and the duck had become a doctor// and she cured them.] [After, when they all were healed,// they all played together.] [They bought bread// and gave him the little frog// that was in the pond,] [they went on holidays,// so when they come back from holidays // they played with the sand.] [When they went swimming,// a crab bit the brother's toe] [and the nurse dropped a medicine cabinet containing all the viruses// and they became infected.] [Then all the zoo animals escaped from the zoo,// then when they saw that the animals escaped// they put them all inside] [and then they went back to the beach// and dived,// and they collided] [and went to the doctor again.] [There was a magical bird// that gave them magical powers// that they would always be happy] [and then with the bird's powers// they were cured] [and come back to the beach.]

|               |                       |   |
|---------------|-----------------------|---|
| Platform Use  | Mute a Partner        | 1 |
|               | Interruptions         | 1 |
|               | Off-topic chat use    | 1 |
|               | Group self regulation | 3 |
|               | Positive comments     | 3 |
| Collaboration | Focus on the task     | 3 |
|               | Social awareness      | 3 |
|               | Social cognition      | 3 |
|               | Social motivation     | 3 |
|               | Space for everyone    | 3 |
|               | Inclusion             | 3 |

|                                      |                            |     |
|--------------------------------------|----------------------------|-----|
| Story words, Propositions & Episodes | Number of words            | 509 |
|                                      | Propositions               | 85  |
|                                      | Episodes                   | 35  |
| Story Structure and Cohesion         | Narrative structure        | 4   |
|                                      | Narrative cohesion         | 5   |
| Story content balance indexes        | Balance 1                  | 6   |
|                                      | Balance 2                  | 1   |
|                                      | Balance 3                  | 2   |
|                                      | Balance 4                  | -1  |
| Covid-19 related content (0-1)       | Direct ref.                | 1   |
|                                      | Indirect ref (catastrophe) | 0   |
|                                      | Indirect ref. (illness)    | 0   |

**Table S2:** Story 10, 5th grade with indirect (illness) reference to COVID-19 theme

|                                                                                                                                                                                                                                                                                                                                                                                                                                                                                                                                                                                                                                                                                                                                                                                                                                                                                                                                                                                                                                                                                                                                                                                                                                                                                                                                                                                                                                                                                                                                                                                                                                                                                         |                            |     |
|-----------------------------------------------------------------------------------------------------------------------------------------------------------------------------------------------------------------------------------------------------------------------------------------------------------------------------------------------------------------------------------------------------------------------------------------------------------------------------------------------------------------------------------------------------------------------------------------------------------------------------------------------------------------------------------------------------------------------------------------------------------------------------------------------------------------------------------------------------------------------------------------------------------------------------------------------------------------------------------------------------------------------------------------------------------------------------------------------------------------------------------------------------------------------------------------------------------------------------------------------------------------------------------------------------------------------------------------------------------------------------------------------------------------------------------------------------------------------------------------------------------------------------------------------------------------------------------------------------------------------------------------------------------------------------------------|----------------------------|-----|
| <p>Story ID: 10;<br/> Grade: 5th grade.<br/> Number of participants: 5;<br/> Total participants with difficulties: 0;<br/> Storytelling methodology: little group.<br/> Session theme: Family.<br/> Date: 28/04/2020.<br/> COVID theme references: 1 (indirect - illness). Propositions: // ...//. Episodes: [...].<br/> Cohesion index 8 (Dyadic structure with intermediate problem-solution events).<br/> Structure index: 4</p> <p>COHESION INDEX: 8 (Dyadic structure with intermediate problem-solution events). In the story, children introduce a problem-solution dyad with an event between the problem and its solution. An intermediate problem-solution element is an event where the actions of one or more characters lead to solving or complicating the initial problem. Actions that can be part of an intermediate problem-solution event are, for example, "asking for and giving help," "calling the policeman," etc.</p> <p>STORY (the number of story words can vary due to Spanish-English translation): [Once there were four bears// who couldn't cook], [and once they had a party in their area// and they had to bring food//] [and then they had to buy food,//but since it was illegal in this area//, the police arrested them// and told them// that they had to cook themselves,// taking them to the police station.] [they let them go// but told them they had to prepare their food//so they prepared the food] [and when people ate it// they all started vomiting// and had to call the doctor]. [The doctor cured them with rabbit soup// and they were healed,] [but after this traumatic experience// they decided never to cook again].</p> |                            |     |
| Platform Use                                                                                                                                                                                                                                                                                                                                                                                                                                                                                                                                                                                                                                                                                                                                                                                                                                                                                                                                                                                                                                                                                                                                                                                                                                                                                                                                                                                                                                                                                                                                                                                                                                                                            | Mute a Partner             | 1   |
|                                                                                                                                                                                                                                                                                                                                                                                                                                                                                                                                                                                                                                                                                                                                                                                                                                                                                                                                                                                                                                                                                                                                                                                                                                                                                                                                                                                                                                                                                                                                                                                                                                                                                         | Interruptions              | 2   |
|                                                                                                                                                                                                                                                                                                                                                                                                                                                                                                                                                                                                                                                                                                                                                                                                                                                                                                                                                                                                                                                                                                                                                                                                                                                                                                                                                                                                                                                                                                                                                                                                                                                                                         | Off-topic chat use         | 1   |
|                                                                                                                                                                                                                                                                                                                                                                                                                                                                                                                                                                                                                                                                                                                                                                                                                                                                                                                                                                                                                                                                                                                                                                                                                                                                                                                                                                                                                                                                                                                                                                                                                                                                                         | Group self regulation      | 2   |
|                                                                                                                                                                                                                                                                                                                                                                                                                                                                                                                                                                                                                                                                                                                                                                                                                                                                                                                                                                                                                                                                                                                                                                                                                                                                                                                                                                                                                                                                                                                                                                                                                                                                                         | Positive comments          | 1   |
| Collaboration                                                                                                                                                                                                                                                                                                                                                                                                                                                                                                                                                                                                                                                                                                                                                                                                                                                                                                                                                                                                                                                                                                                                                                                                                                                                                                                                                                                                                                                                                                                                                                                                                                                                           | Focus on the task          | 2   |
|                                                                                                                                                                                                                                                                                                                                                                                                                                                                                                                                                                                                                                                                                                                                                                                                                                                                                                                                                                                                                                                                                                                                                                                                                                                                                                                                                                                                                                                                                                                                                                                                                                                                                         | Social awareness           | 2   |
|                                                                                                                                                                                                                                                                                                                                                                                                                                                                                                                                                                                                                                                                                                                                                                                                                                                                                                                                                                                                                                                                                                                                                                                                                                                                                                                                                                                                                                                                                                                                                                                                                                                                                         | Social cognition           | 3   |
|                                                                                                                                                                                                                                                                                                                                                                                                                                                                                                                                                                                                                                                                                                                                                                                                                                                                                                                                                                                                                                                                                                                                                                                                                                                                                                                                                                                                                                                                                                                                                                                                                                                                                         | Social motivation          | 3   |
|                                                                                                                                                                                                                                                                                                                                                                                                                                                                                                                                                                                                                                                                                                                                                                                                                                                                                                                                                                                                                                                                                                                                                                                                                                                                                                                                                                                                                                                                                                                                                                                                                                                                                         | Space for everyone         | 3   |
|                                                                                                                                                                                                                                                                                                                                                                                                                                                                                                                                                                                                                                                                                                                                                                                                                                                                                                                                                                                                                                                                                                                                                                                                                                                                                                                                                                                                                                                                                                                                                                                                                                                                                         | Inclusion                  | 3   |
| Story words, Propositions & Episodes                                                                                                                                                                                                                                                                                                                                                                                                                                                                                                                                                                                                                                                                                                                                                                                                                                                                                                                                                                                                                                                                                                                                                                                                                                                                                                                                                                                                                                                                                                                                                                                                                                                    | Number of words            | 113 |
|                                                                                                                                                                                                                                                                                                                                                                                                                                                                                                                                                                                                                                                                                                                                                                                                                                                                                                                                                                                                                                                                                                                                                                                                                                                                                                                                                                                                                                                                                                                                                                                                                                                                                         | Propositions               | 21  |
|                                                                                                                                                                                                                                                                                                                                                                                                                                                                                                                                                                                                                                                                                                                                                                                                                                                                                                                                                                                                                                                                                                                                                                                                                                                                                                                                                                                                                                                                                                                                                                                                                                                                                         | Episodes                   | 7   |
| Story Structure and Cohesion                                                                                                                                                                                                                                                                                                                                                                                                                                                                                                                                                                                                                                                                                                                                                                                                                                                                                                                                                                                                                                                                                                                                                                                                                                                                                                                                                                                                                                                                                                                                                                                                                                                            | Narrative structure        | 4   |
|                                                                                                                                                                                                                                                                                                                                                                                                                                                                                                                                                                                                                                                                                                                                                                                                                                                                                                                                                                                                                                                                                                                                                                                                                                                                                                                                                                                                                                                                                                                                                                                                                                                                                         | Narrative cohesion         | 8   |
| Story content balance indexes                                                                                                                                                                                                                                                                                                                                                                                                                                                                                                                                                                                                                                                                                                                                                                                                                                                                                                                                                                                                                                                                                                                                                                                                                                                                                                                                                                                                                                                                                                                                                                                                                                                           | Balance 1                  | 2   |
|                                                                                                                                                                                                                                                                                                                                                                                                                                                                                                                                                                                                                                                                                                                                                                                                                                                                                                                                                                                                                                                                                                                                                                                                                                                                                                                                                                                                                                                                                                                                                                                                                                                                                         | Balance 2                  | 4   |
|                                                                                                                                                                                                                                                                                                                                                                                                                                                                                                                                                                                                                                                                                                                                                                                                                                                                                                                                                                                                                                                                                                                                                                                                                                                                                                                                                                                                                                                                                                                                                                                                                                                                                         | Balance 3                  | 0   |
|                                                                                                                                                                                                                                                                                                                                                                                                                                                                                                                                                                                                                                                                                                                                                                                                                                                                                                                                                                                                                                                                                                                                                                                                                                                                                                                                                                                                                                                                                                                                                                                                                                                                                         | Balance 4                  | 0   |
| Covid-19 related content (0-1)                                                                                                                                                                                                                                                                                                                                                                                                                                                                                                                                                                                                                                                                                                                                                                                                                                                                                                                                                                                                                                                                                                                                                                                                                                                                                                                                                                                                                                                                                                                                                                                                                                                          | Direct ref.                | 0   |
|                                                                                                                                                                                                                                                                                                                                                                                                                                                                                                                                                                                                                                                                                                                                                                                                                                                                                                                                                                                                                                                                                                                                                                                                                                                                                                                                                                                                                                                                                                                                                                                                                                                                                         | Indirect ref (catastrophe) | 0   |
|                                                                                                                                                                                                                                                                                                                                                                                                                                                                                                                                                                                                                                                                                                                                                                                                                                                                                                                                                                                                                                                                                                                                                                                                                                                                                                                                                                                                                                                                                                                                                                                                                                                                                         | Indirect ref. (illness)    | 1   |

**Table S3:** Descriptive Statistics (116 students; 71 sessions; 81 stories)

| Grade                                     |                                           | 1st          | 2nd             | 3rd             | 4th             | 5th             |                |
|-------------------------------------------|-------------------------------------------|--------------|-----------------|-----------------|-----------------|-----------------|----------------|
| Number of stories                         |                                           | 12           | 20              | 6               | 14              | 29              |                |
| STORY FORM                                | Number of words                           | M (SD)       | 402.41 (119.52) | 289.65 (138.37) | 444.00 (138.93) | 337.57 (135.50) | 221.31 (86.00) |
|                                           |                                           | Min; Max     | 217; 587        | 97; 676         | 210; 586        | 120; 648        | 78; 427        |
|                                           |                                           | Shapiro Wilk | p = 0.88        | p = 0.16        | p = 0.35        | p = 0.85        | p = 0.63       |
|                                           | Propositions                              | M (SD)       | 61.25 (18.32)   | 46.65 (20.47)   | 73.00 (25.559)  | 51.14 (16.90)   | 33.14 (13.79)  |
|                                           |                                           | Min; Max     | 33; 85          | 18; 101         | 25; 92          | 23; 85          | 10; 63         |
|                                           |                                           | Shapiro Wilk | p = 0.45        | p = 0.28        | p = 0.03        | p = 0.76        | p = 0.28       |
|                                           | Episodes                                  | M (SD)       | 21.0 (6.71)     | 15 (5.73)       | 22.17 (7.11)    | 13.93 (4.65)    | 11.41 (4.82)   |
|                                           |                                           | Min; Max     | 14; 35          | 7; 29           | 9; 30           | 8; 24           | 4; 27          |
|                                           |                                           | Shapiro Wilk | p = 0.50        | p = 0.49        | p = 0.38        | p = 0.31        | p <.01         |
|                                           | Narrative structure                       | M (SD)       | 4.25 (.75)      | 4.15 (.93)      | 4.17 (.98)      | 4.64 (.93)      | 4.00 (1.07)    |
|                                           |                                           | Min; Max     | 3; 6            | 3; 6            | 3; 5            | 3; 6            | 2; 6           |
|                                           |                                           | Shapiro Wilk | p = 0.04        | p = 0.01        | p = 0.12        | p = 0.05        | p < 0.01       |
|                                           | Narrative cohesion                        | M (SD)       | 8.25 (2.09)     | 8.25 (1.68)     | 7.83 (2.23)     | 9.14 (0.95)     | 8.10 (1.52)    |
|                                           |                                           | Min; Max     | 5; 11           | 5; 11           | 6; 11           | 8; 11           | 6; 11          |
|                                           |                                           | Shapiro Wilk | p = 0.25        | p = 0.23        | p = 0.04        | p < 0.01        | p < 0.01       |
| STORY CONTENT                             | Problems positively solved                | M (SD)       | 3.17 (2.12)     | 1.80 (1.79)     | 1.00 (1.09)     | 3.43 (2.34)     | 2.45 (1.72)    |
|                                           |                                           | Min; Max     | 0; 8            | 0; 8            | 0; 3            | 0; 7            | 0; 6           |
|                                           |                                           | Shapiro Wilk | p = 0.63        | p <.01          | p < 0.01        | p = 0.25        | p = 0.22       |
|                                           | Problems negatively solved                | M (SD)       | 1.75 (1.71)     | 2.40 (2.46)     | 1.17 (1.17)     | 1.31 (1.60)     | 1.46 (1.83)    |
|                                           |                                           | Min; Max     | 0; 4            | 0; 11           | 0; 3            | 0; 5            | 0; 7           |
|                                           |                                           | Shapiro Wilk | p = 0.03        | p < 0.01        | p = 0.42        | p < 0.01        | p < 0.01       |
|                                           | Problems without solution                 | M (SD)       | 2.67 (1.97)     | 2.05 (1.54)     | 1.67 (0.82)     | 2.43 (1.28)     | 1.62 (1.01)    |
|                                           |                                           | Min; Max     | 0; 6            | 0; 5            | 1; 3            | 0; 4            | 0; 3           |
|                                           |                                           | Shapiro Wilk | p = 0.39        | p = 0.02        | p = 0.31        | p = 0.13        | p <.01         |
|                                           | Total problems                            | M (SD)       | 1.08 (1.24)     | 1.10 (1.16)     | 1.00 (1.26)     | 0.57 (.85)      | 0.93 (1.25)    |
|                                           |                                           | Min; Max     | 0;4             | 0; 3            | 0; 3            | 0; 3            | 0; 4           |
|                                           |                                           | Shapiro Wilk | p = 0.03        | p < 0.01        | p = 0.04        | p <.01          | p < 0.01       |
|                                           | Positive relationships between characters | M (SD)       | 1.67 (1.37)     | 1.05 (.76)      | 1.00 (.00)      | 0.29 (.47)      | 0.83 (.97)     |
|                                           |                                           | Min; Max     | 0; 5            | 0; 3            | 1; 1            | 0; 1            | 0; 3           |
|                                           |                                           | Shapiro Wilk | p = 0.02        | p < 0.01        | p < 0.01        | p < 0.01        | p < 0.01       |
| Negative relationships between characters | M (SD)                                    | 5.00 (2.80)  | 3.95 (1.85)     | 3.50 (1.38)     | 3.14 (1.10)     | 2.79 (1.45)     |                |
|                                           | Min; Max                                  | 0; 10        | 1; 8            | 2; 5            | 1; 5            | 0; 7            |                |
|                                           | Shapiro Wilk                              | p < 0.01     | p = 0.32        | p = 0.42        | p = 0.24        | p = 0.06        |                |
| Characters' adaptive behaviors            | M (SD)                                    | 2.08 (1.88)  | 1.90 (1.55)     | 1.67 (1.03)     | 2.00 (1.17)     | 1.52 (.95)      |                |
|                                           | Min; Max                                  | 0; 6         | 0; 5            | 0; 3            | 0; 4            | 0; 3            |                |
|                                           | Shapiro Wilk                              | p = 0.04     | p = 0.01        | p = 0.32        | p = 0.14        | p < 0.01        |                |
| Characters' aggressive behavior           | M (SD)                                    | 1.83 (1.95)  | 2.20 (2.55)     | 2.50 (2.34)     | 1.57 (1.45)     | 1.24 (1.62)     |                |
|                                           | Min; Max                                  | 0; 6         | 0; 12           | 0; 6            | 0; 4            | 0; 7            |                |
|                                           | Shapiro Wilk                              | p = 0.16     | p < 0.01        | p = 0.42        | p = 0.03        | p < 0.01        |                |
| Characters' rule-rejecting behaviors      | M (SD)                                    | 0.42 (.99)   | 0.50 (1.10)     | 1.17 (1.17)     | 0.50 (1.09)     | 0.41 (.63)      |                |
|                                           | Min; Max                                  | 0; 3         | 0; 4            | 0; 3            | 0; 4            | 0; 2            |                |
|                                           | Shapiro Wilk                              | p < 0.01     | p < 0.01        | p = 0.31        | p < 0.01        | p < 0.01        |                |
| Characters' guilt-ridden behaviors        | M (SD)                                    | 0.18 (.40)   | 0.50 (.22)      | 0.50 (.84)      | 0.07 (.27)      | 0.21 (.62)      |                |
|                                           | Min; Max                                  | 0; 1         | 0; 1            | 0; 2            | 0; 1            | 0; 3            |                |
|                                           | Shapiro Wilk                              | p < 0.01     | p < 0.01        | p < 0.01        | p < 0.01        | p <.01          |                |
| Balance 1. positive vs negative           | M (SD)                                    | 1.75 (2.45)  | 1.05 (2.11)     | 0.67 (1.75)     | 2.28 (1.26)     | 1.00 (1.67)     |                |
|                                           | Min; Max                                  | -3; 6        | -3; 5           | -2; 3           | 0; 4            | -3; 3           |                |

|               |                                               |              |              |              |              |              |              |
|---------------|-----------------------------------------------|--------------|--------------|--------------|--------------|--------------|--------------|
| PLATFORM USE  | problems solution                             | Shapiro Wilk | p = 0.91     | p = 0.44     | p = 0.92     | p = 0.25     | p < 0.01     |
|               | Balance 2. solved vs not-solved problems      | M (SD)       | 2.17 (2.25)  | 1.75 (2.47)  | 0.50 (1.87)  | 2.71 (1.20)  | 1.76 (1.33)  |
|               |                                               | Min; Max     | -1; 6        | -5; 6        | -3; 2        | 1; 4         | -1; 4        |
|               |                                               | Shapiro Wilk | p = 0.54     | p = 0.20     | p = 0.22     | p = 0.03     | p = 0.02     |
|               | Balance 3. positive vs negative relationships | M (SD)       | 1.42 (2.47)  | -0.70 (3.03) | -0.17 (1.72) | 1.71 (2.58)  | 1.14 (2.37)  |
|               |                                               | Min; Max     | -1; 8        | -11; 4       | -3; 2        | -3; 7        | -4; 6        |
|               |                                               | Shapiro Wilk | p < 0.01     | p <.01       | p = 0.49     | p = 0.99     | p = 0.23     |
|               | Balance 4. adaptive vs non adaptive behavior  | M (SD)       | -0.33 (2.60) | -0.85 (3.06) | -2.50 (2.88) | -0.07 (2.09) | -0.38 (1.97) |
|               |                                               | Min; Max     | -6; 2        | -11; 4       | -7; 1        | -3; 3        | -5; 2        |
|               |                                               | Shapiro Wilk | p = 0.09     | p < 0.01     | p = 0.75     | p = 0.08     | p = 0.14     |
|               | Mute a partner                                | M (SD)       | 1.33 (0.65)  | 1.50 (0.69)  | 1.0 (0.00)   | 1.0 (0.00)   | 1.31 (0.71)  |
|               |                                               | Min; Max     | 1; 3         | 1; 3         | 1; 1         | 1; 1         | 1; 3         |
|               |                                               | Shapiro Wilk | p < 0.01     | p < 0.01     | p < 0.01     | p <.01       | p <.01       |
|               | Interrupt                                     | M (SD)       | 1.08 (0.29)  | 1.75 (0.64)  | 1.0 (0.00)   | 1.0 (0.00)   | 1.45 (0.74)  |
|               |                                               | Min; Max     | 1; 2         | 1; 3         | 1; 1         | 1; 1         | 1; 3         |
|               |                                               | Shapiro Wilk | p < 0.01     | p < 0.01     | p < 0.01     | p <.01       | p <.01       |
|               | Off topic chat use                            | M (SD)       | 1 (0.00)     | 1.55 (0.76)  | 1.17 (0.41)  | 1.07 (0.27)  | 1.24 (0.57)  |
|               |                                               | Min; Max     | 1; 1         | 1; 3         | 1; 2         | 1; 2         | 1; 3         |
|               |                                               | Shapiro Wilk | p < 0.01     | p < 0.01     | p < 0.01     | p <.01       | p <.01       |
|               | Group self-regulation                         | M (SD)       | 2 (0.85)     | 1.40 (0.60)  | 1.17 (0.41)  | 1.07 (0.27)  | 1.58 (0.68)  |
|               |                                               | Min; Max     | 1; 3         | 1; 3         | 1; 2         | 1; 2         | 1; 3         |
|               |                                               | Shapiro Wilk | p = 0.02     | p < 0.01     | p < 0.01     | p < 0.01     | p <.01       |
|               | Positive comments                             | M (SD)       | 2.42 (0.67)  | 1.60 (0.68)  | 2.17 (0.98)  | 2.5 (0.52)   | 2.03 (0.68)  |
|               |                                               | Min; Max     | 1; 3         | 1; 3         | 1; 3         | 2; 3         | 1; 3         |
|               |                                               | Shapiro Wilk | p < 0.01     | p < 0.01     | p = 0.04     | p < 0.01     | p < 0.01     |
| COLLABORATION | Focus on the task                             | M (SD)       | 2.75 (0.45)  | 2.35 (0.49)  | 3.00 (0.00)  | 2.86 (0.36)  | 2.41 (0.73)  |
|               |                                               | Min; Max     | 2; 3         | 2; 3         | 3; 3         | 2; 3         | 1; 3         |
|               |                                               | Shapiro Wilk | p < 0.01     | p < 0.01     | p < 0.01     | p <.01       | p <.01       |
|               | Social awareness                              | M (SD)       | 3.00 (0.00)  | 1.85 (0.67)  | 2.66 (0.52)  | 3.00 (0.00)  | 2.41 (0.63)  |
|               |                                               | Min; Max     | 3; 3         | 1; 3         | 2; 3         | 3; 3         | 1; 3         |
|               |                                               | Shapiro Wilk | p < 0.01     | p < 0.01     | p < 0.01     | p <.01       | p <.01       |
|               | Social cognition                              | M (SD)       | 3.00 (0.00)  | 1.90 (0.72)  | 2.33 (0.52)  | 3.00 (0.00)  | 2.45 (0.63)  |
|               |                                               | Min; Max     | 3; 3         | 1; 3         | 2;3          | 3; 3         | 1; 3         |
|               |                                               | Shapiro Wilk | p < 0.01     | p < 0.01     | p < 0.01     | p <.01       | p <.01       |
|               | Social communication                          | M (SD)       | 3.00 (0.00)  | 2.10 (0.85)  | 3.00 (0.00)  | 2.93 (0.27)  | 2.65 (0.48)  |
|               |                                               | Min; Max     | 3; 3         | 1; 3         | 3; 3         | 2; 3         | 2; 3         |
|               |                                               | Shapiro Wilk | p < 0.01     | p < 0.01     | p < 0.01     | p <.01       | p <.01       |
|               | Social motivation                             | M (SD)       | 2.75 (0.45)  | 2.20 (0.52)  | 2.83 (0.41)  | 2.93 (0.27)  | 2.62 (0.56)  |
|               |                                               | Min; Max     | 2; 3         | 1; 3         | 2; 3         | 2; 3         | 1; 3         |
|               |                                               | Shapiro Wilk | p < 0.01     | p < 0.01     | p < 0.01     | p <.01       | p <.01       |
|               | Space for everyone                            | M (SD)       | 2.92 (0.29)  | 2.20 (0.61)  | 3.00 (0.00)  | 3.00 (0.00)  | 2.45 (0.57)  |
|               |                                               | Min; Max     | 2; 3         | 1; 3         | 3; 3         | 3; 3         | 1; 3         |
|               |                                               | Shapiro Wilk | p < 0.01     | p < 0.01     | p < 0.01     | p <.01       | p <.01       |
|               | Inclusion                                     | M (SD)       | 2.92 (0.29)  | 2.20 (0.61)  | 3.00 (0.00)  | 3.00 (0.00)  | 2.65 (0.48)  |
|               |                                               | Min; Max     | 2; 3         | 1; 3         | 3; 3         | 3; 3         | 2; 3         |
|               |                                               | Shapiro Wilk | p < 0.01     | p < 0.01     | p < 0.01     | p <.01       | p <.01       |
